# Supplementary material
Source: MDPI journal article supplement (https://www.mdpi.com/2073-4395/12/10/2576)
Supplement: s1 [file s1]

Supplementary Material for Article

# Effect of Different Cover Crops, Mass-Trapping Systems and Environmental Factors on Invertebrate Activity in Table Olive Orchards—Results from Field Experiments in Crete, Greece

Nikolaos Volakakis <sup>1,2,3,\*</sup>, Emmanouil Kabourakis <sup>1</sup>, Leonidas Rempelos <sup>3,4</sup>, Apostolos Kiritsakis <sup>5</sup>  
and Carlo Leifert <sup>6,7,\*</sup>

<sup>1</sup> Olive and Agroecological Production Systems Lab (EOPS), Hellenic Mediterranean University, 714 10 Iraklio, Greece

<sup>2</sup> Geokomi Plc, Sivas Festos, P.O. Box 21, 70200 Crete, Greece

<sup>3</sup> Nafferton Ecological Farming Group, Newcastle University, Newcastle upon Tyne NE1 7RU, UK

<sup>4</sup> Lincoln Institute for Agri-Food Technology, University of Lincoln, Riseholme Park, Lincoln LN2 2LG, UK

<sup>5</sup> International Observatory of Oxidative stress for Health and Agricultural Products, 21 Kar. Diehl Str, 54623 Thessaloniki, Greece

<sup>6</sup> SCU Plant Science, Southern Cross University, Military Rd., Lismore, NSW 2480, Australia

<sup>7</sup> Department of Nutrition, IMB, University of Oslo, 0372 Oslo, Norway

\* Correspondence: nvolakakis@gmail.com (N.V.); carlo.leifert@gmail.com (C.L.)

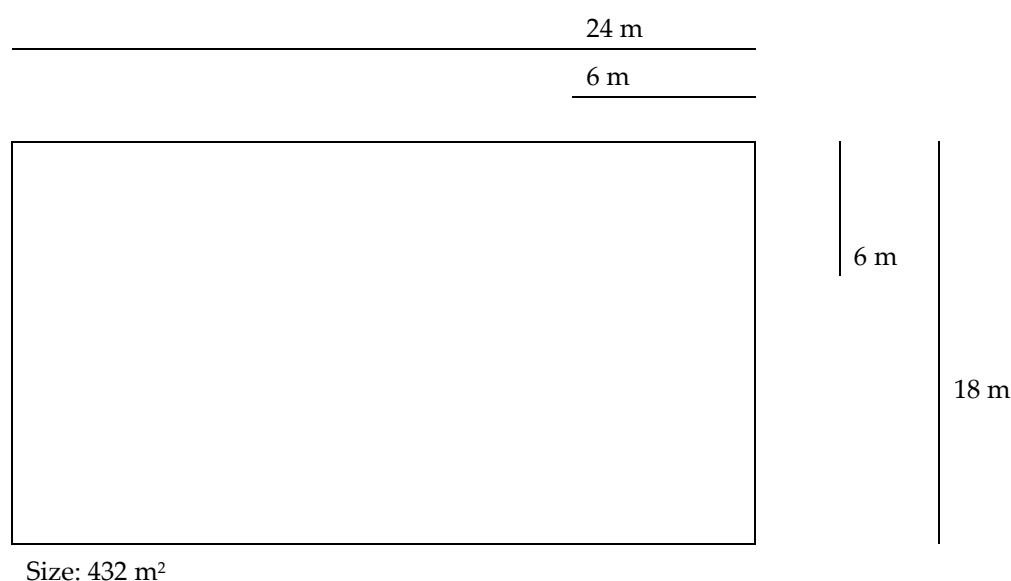

**Supplementary Figure S1.** Dimensions and arrangement of olive trees in an individual cover crop plot; each plot had 12 olive trees and a size of 432 m<sup>2</sup>. , location of individual olive trees.

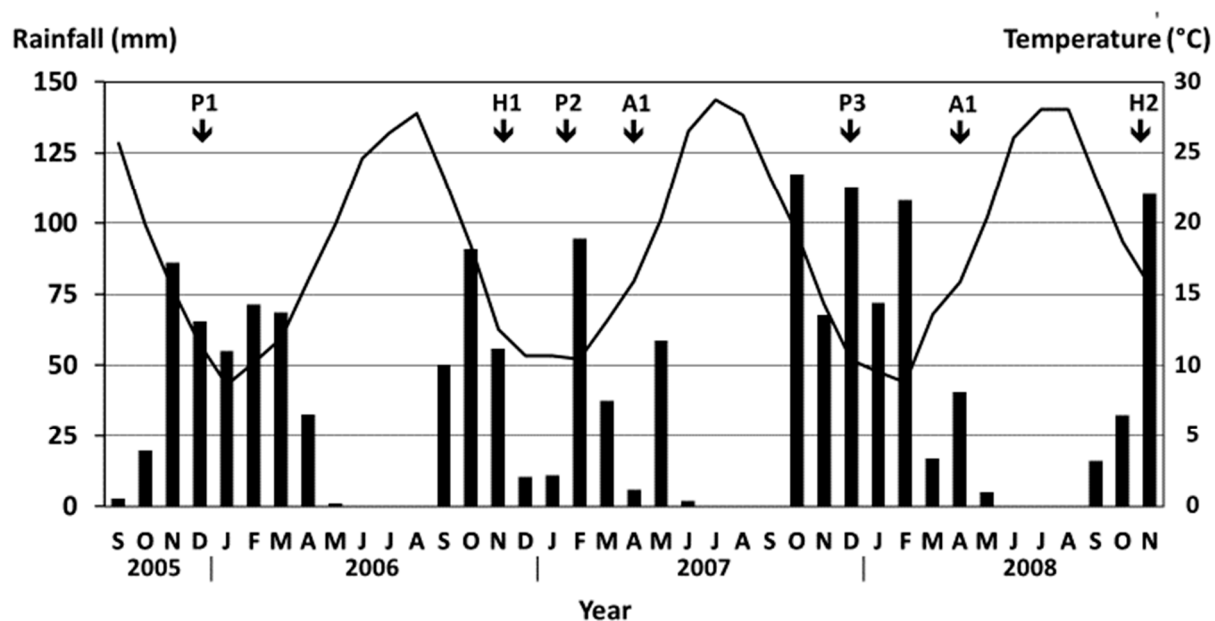

**Supplementary Figure S2.** Average mean daily temperature and total rainfall per months in the three cover-crop growing seasons monitored. P1, P2 and P3 indicate planting dates for cover crops; A1 and A2 indicate the dates on which invertebrate activity assessments were carried out in 2007 and 2008; H1 and H2 indicate the two olive harvests in 2006 and 2008.
